# Supplementary material
Source: PubMed Central journal article supplement (PMC6453720)
Supplement: NIHMS1013483-supplement-Supp_FigS1.pdf [file NIHMS1013483-supplement-Supp_FigS1.pdf]

# Supplemental Figure 1

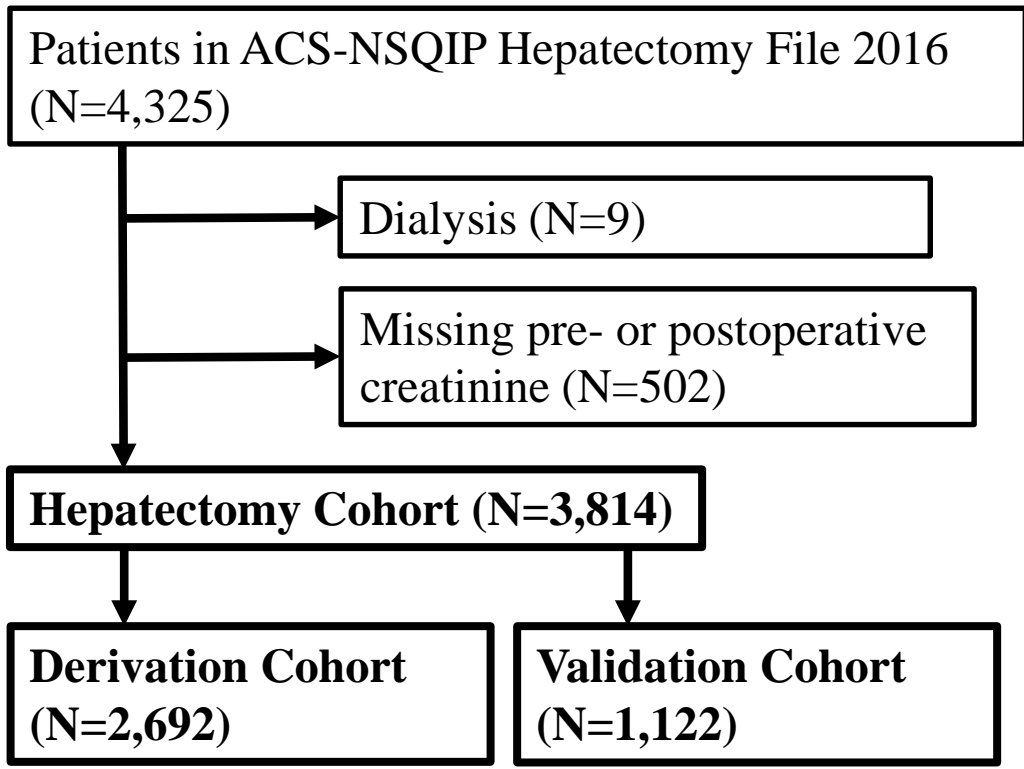

**Supplemental Figure 1.** Selection of hepatectomy patients, American College of Surgeons National Surgical Quality Improvement Program Targeted Hepatectomy File, 2016.
