# Supplementary material
Source: PubMed Central journal article supplement (PMC6453720)
Supplement: NIHMS1013483-supplement-Supp_FigS2.pdf [file NIHMS1013483-supplement-Supp_FigS2.pdf]

## Supplemental Figure 2

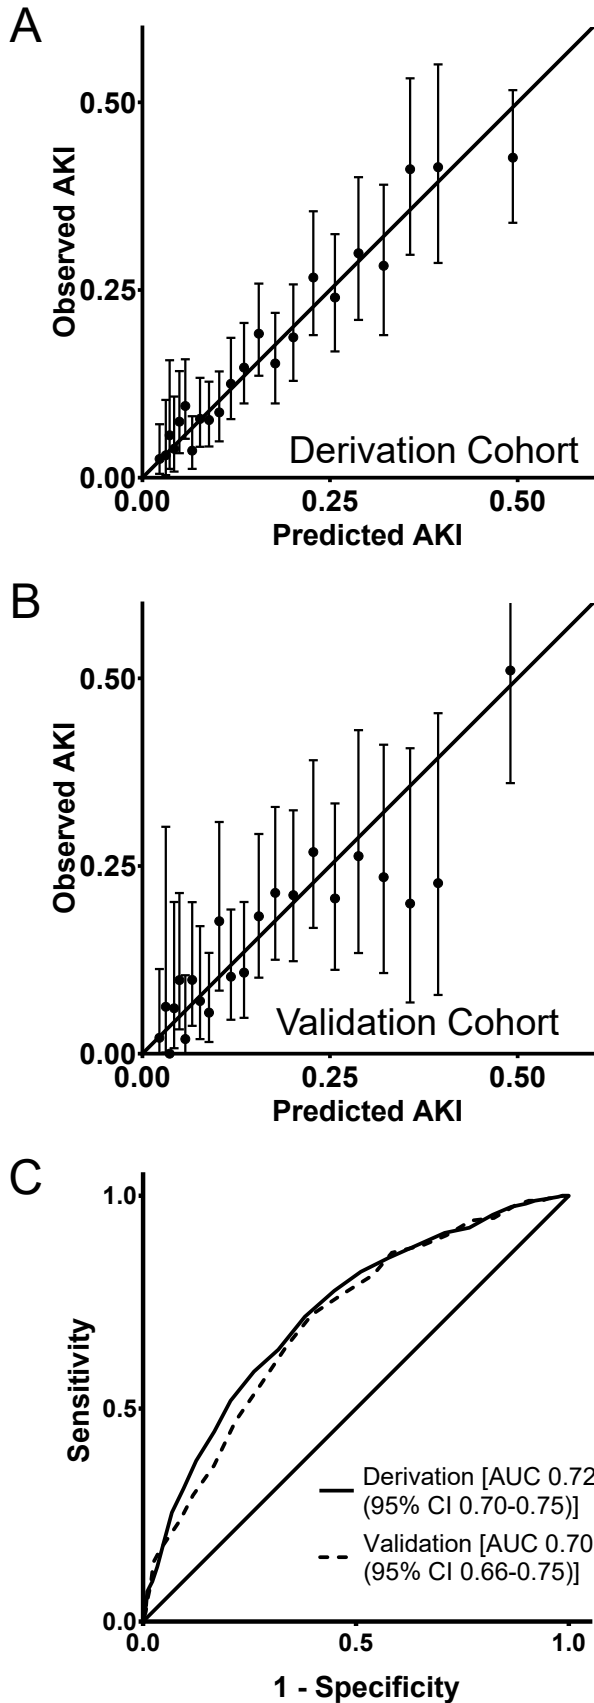

**Supplemental Figure 2.** Calibration plots (by value of the acute kidney injury risk score) (A-B) and receiver operator characteristic curves (C) of the risk score model for AKI in patients undergoing hepatectomy in the derivation cohort (A, C) and the validation cohort (B, C), American College of Surgeons National Surgical Quality Improvement Program, 2016. The risk score ranges from -8 to 30 and each data point represents a distinct value of the risk score, with the exceptions that scores < 0 were combined into one group and scores > 19 were combined into one group. In the calibration plots, the solid line represents perfect calibration the error bars represent the 95% confidence interval for predicted AKI risk. AUC, area under the curve.
